# Supplementary material
Source: publisher figshare collection journal article supplement (https://gsapubs.figshare.com/ndownloader/files/23293163)
Supplement: Supplementary file 1 [file 23293163]

## **SUPPLEMENTARY INFORMATION FIGURE CAPTIONS**

Supplementary figure 1. (A) Distribution of slopes for Volcano Hill geomorphic surfaces. Slopes were created from a 10m digital elevation model (DEM). Symbols indicate the slope class for traps, dams and nail lines. [\* trap; ^ dam; + nail line]

Supplementary figure 1. (B) Distribution of slopes for Arroyo Chavez geomorphic surfaces. Slopes were created from a 10m digital elevation model (DEM). Symbols indicate the slope class for traps, dams and nail lines. [\* trap; ^ dam; + nail line]

Figure 2. Conceptual schematic of cascades. The percentages indicate the how much of the flux out of SRU passes through a cascade.

Supplementary figure 3. Average median grain size ( $D_{50}$ ) and percent fines (silt and clay) for geomorphic surfaces, channel bed and banks, and fluvial samples for A) Volcano Hill Wash and B) Arroyo Chavez.

Supplementary figure 4. Infiltration versus runoff yield and infiltration versus sediment concentration for (A, B) Volcano Hill Wash and (C, D) Arroyo Chavez. Infiltration was measured with single-ring infiltrometers, explained in Supplementary Table 2. Data for each trap is shown in Supplementary Table 7A,B. In Arroyo Chavez, the t4 sediment trap was not used in the line of best fit shown in supplementary figure 3 C, D. [Note, the regression model was not significant for either watershed at  $p = 0.05$ ].

Supplementary figure 5. First order subbasins and intervening contributing areas constructed from GIS for: (A) Volcano Hill Wash and (B) Arroyo Chavez. Intervening contributing areas are between the first order basins and the next downstream stream order intersection.

**A**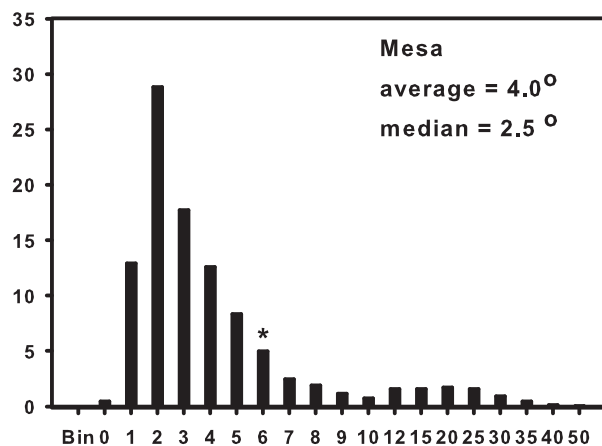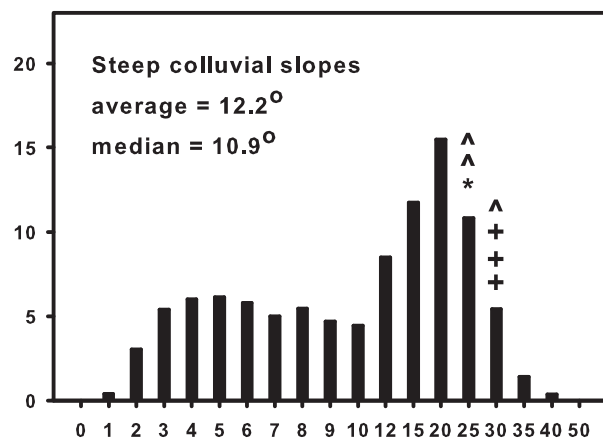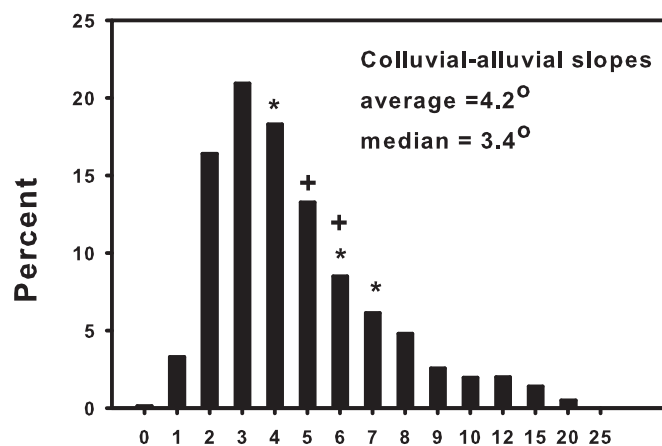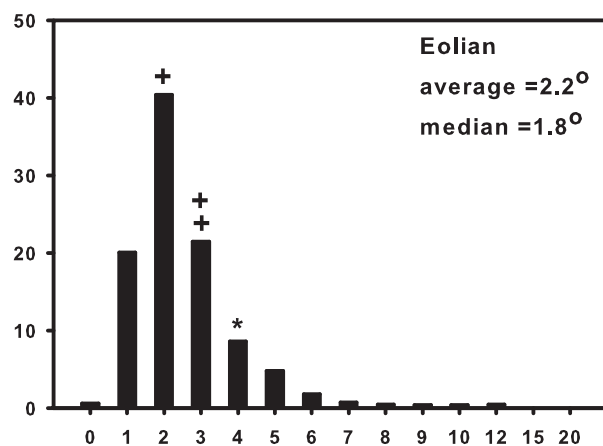

**Slope, degrees**

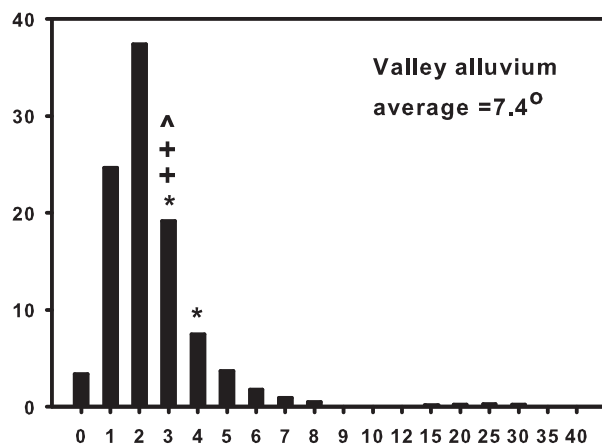

**Slope, degrees**

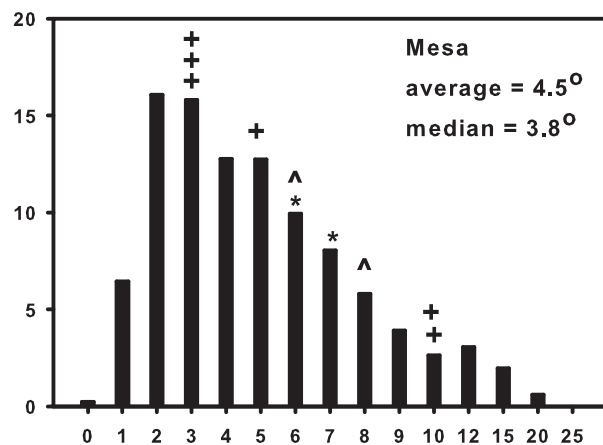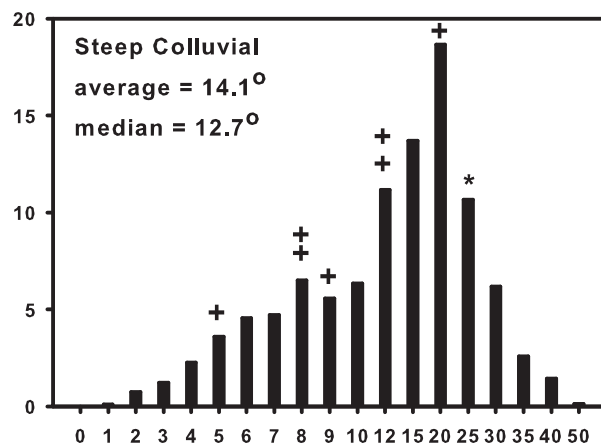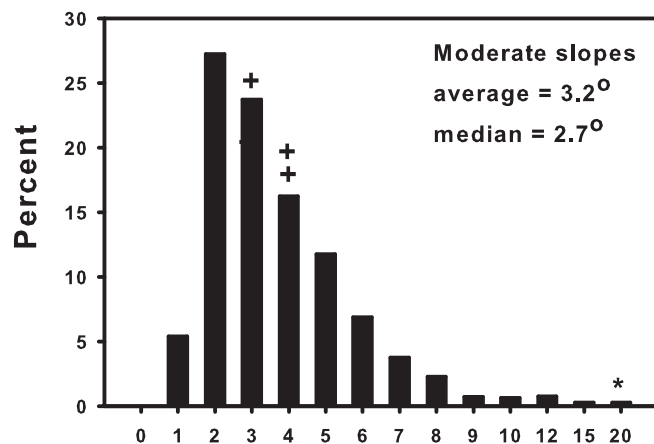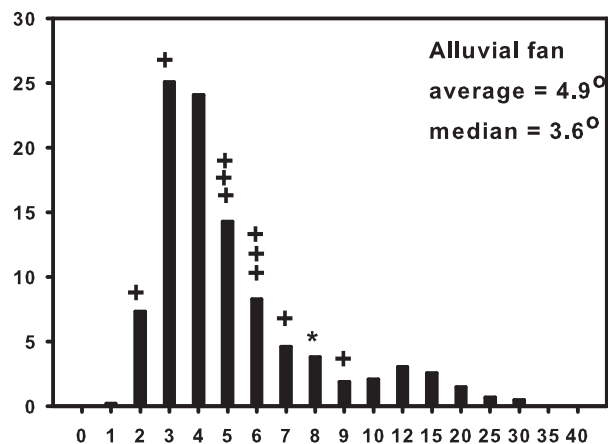

Slope, degrees

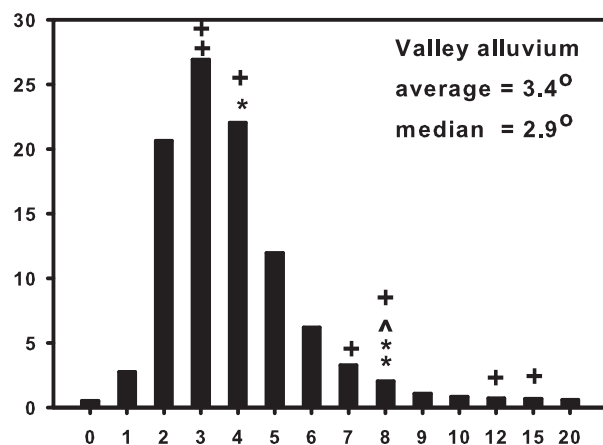

Slope, degrees

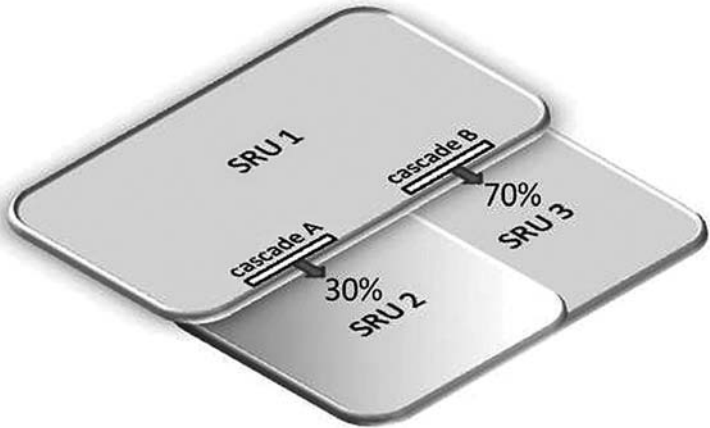

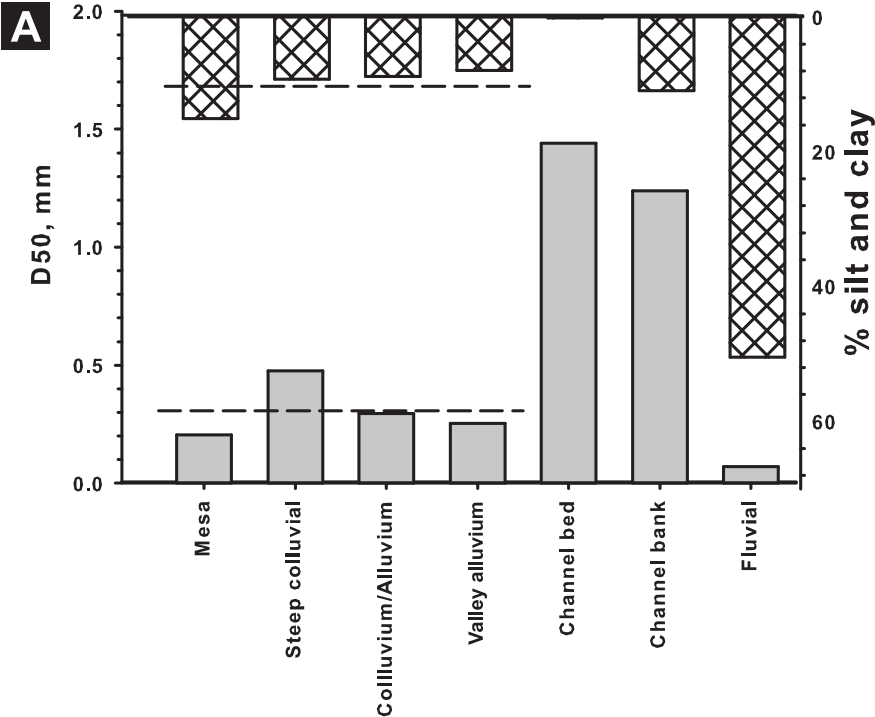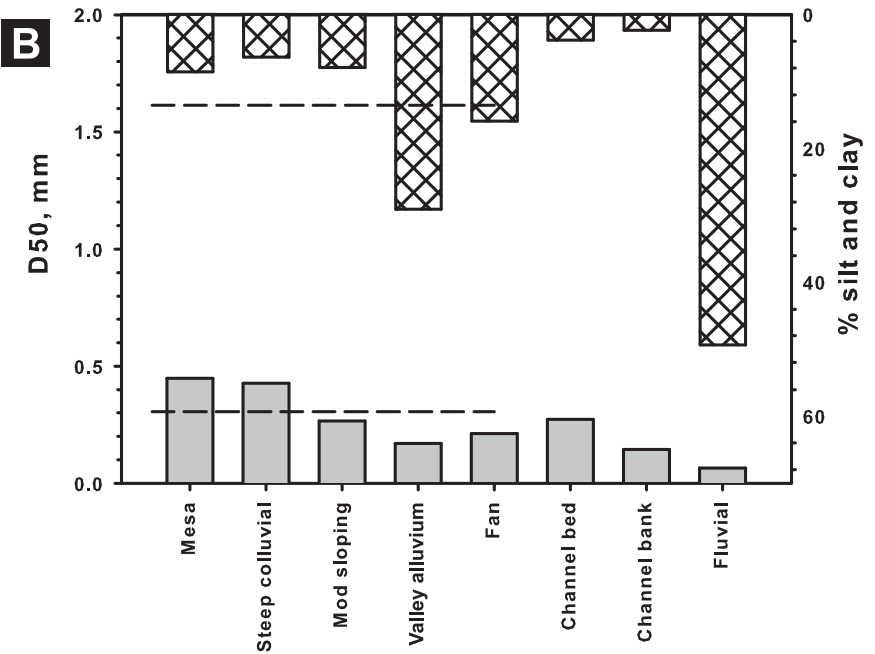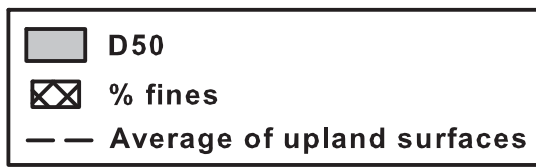

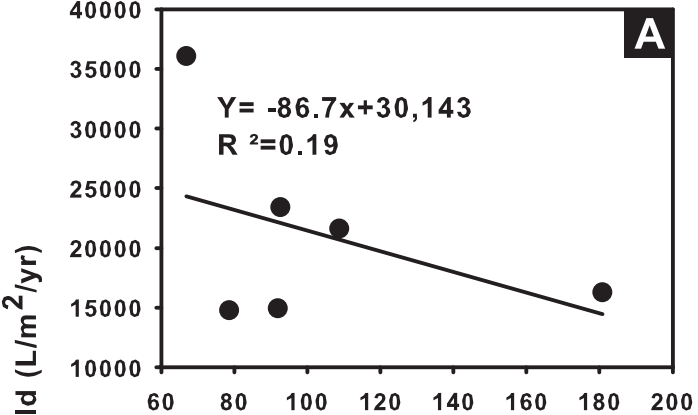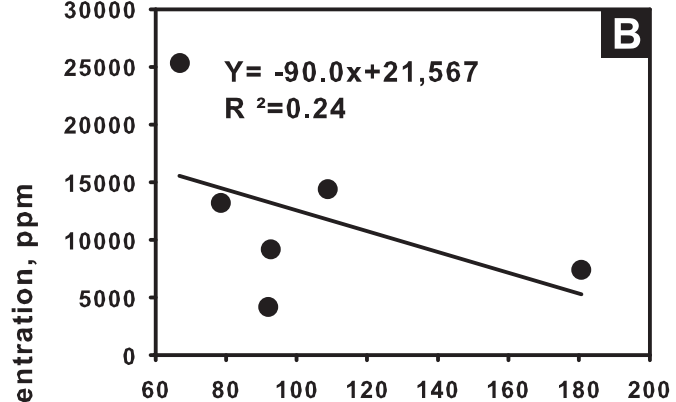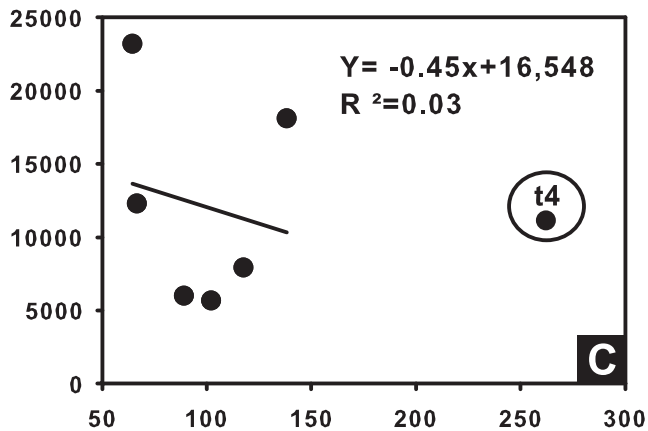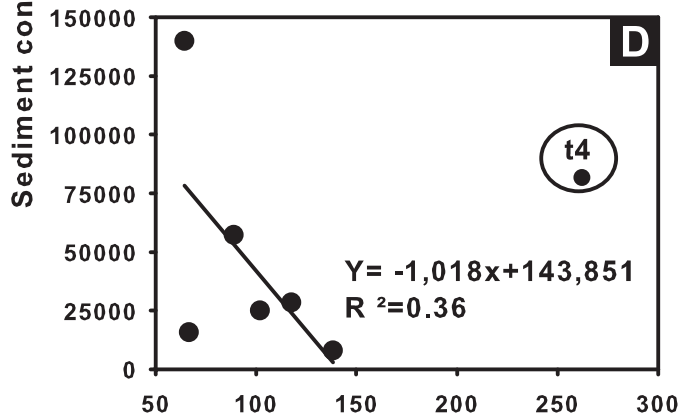

Infiltration (mm/hr)

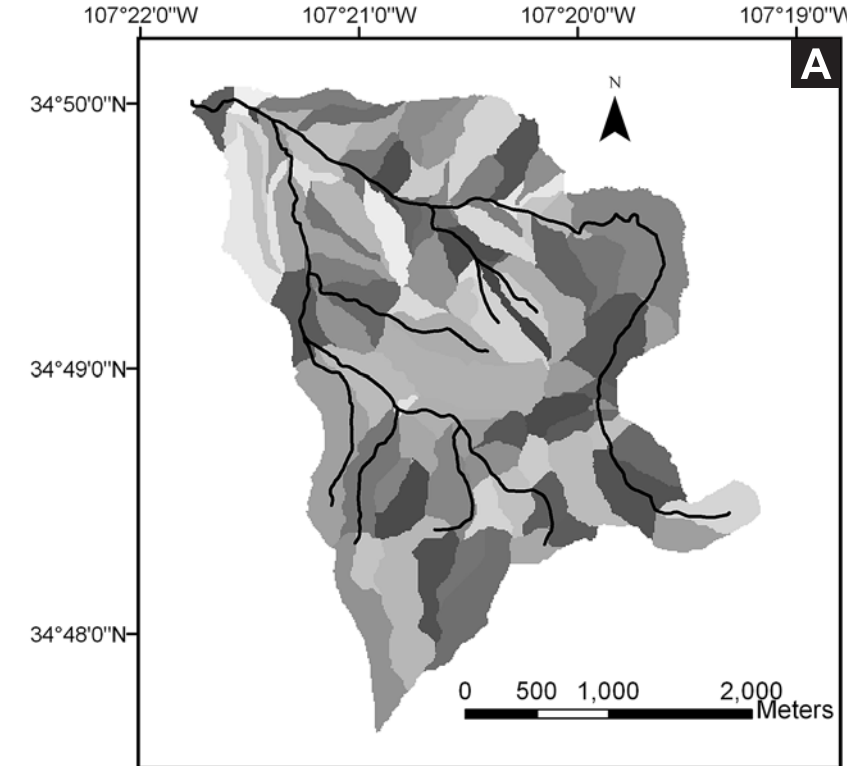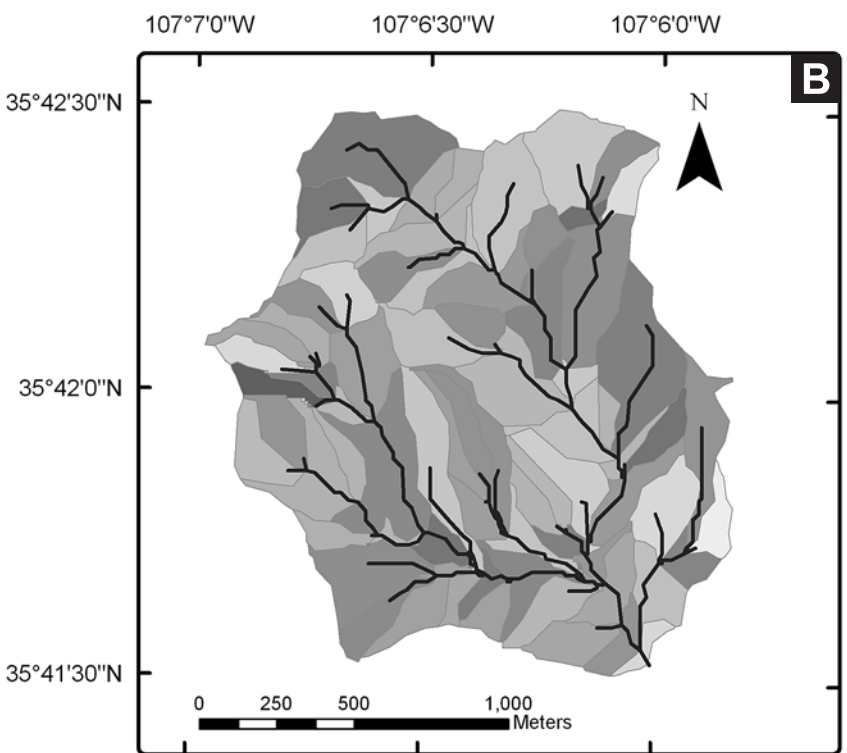

SUPPLEMENTARY TABLE DR1. LITERATURE REVIEW ON SEDIMENT BUDGET STUDIES COMPLETED OVER A RANGE OF SPATIAL AND TEMPORAL SCALES WITH ERRORS REPORTED FOR EACH STUDY.

| Continent                                                                                                                                                                                                                                                                                                                                                                                                                                                                                                                                                                                                                                                                                                                                                                                                         | Spatial scales                                                                                                                                                                                                                                                                                                                                                                                                                                                                | Time scales                                                                                                                                                                                                                                                                                                                                                                                                                                                                                               | Methods                                                                                                                                                                                                                                                                                                                                                                                                                                                                                                                                                                                                                                                                                                                                                                                                     | Sediment budget errors cited in the literature on sediment methods and results. [The error is described in bold in parenthesis; nr = not reported]                                                                                                                                                                                                                                                                                                                                                                                                                                                                                                                                                                                                                                                                                                                                                                                                                                                                                                                                                                                                                                                                                                                                                                                                                                                                                                                                                                                                                                                                                                                                                                                                                                                                                                                                                                                                                             |
|-------------------------------------------------------------------------------------------------------------------------------------------------------------------------------------------------------------------------------------------------------------------------------------------------------------------------------------------------------------------------------------------------------------------------------------------------------------------------------------------------------------------------------------------------------------------------------------------------------------------------------------------------------------------------------------------------------------------------------------------------------------------------------------------------------------------|-------------------------------------------------------------------------------------------------------------------------------------------------------------------------------------------------------------------------------------------------------------------------------------------------------------------------------------------------------------------------------------------------------------------------------------------------------------------------------|-----------------------------------------------------------------------------------------------------------------------------------------------------------------------------------------------------------------------------------------------------------------------------------------------------------------------------------------------------------------------------------------------------------------------------------------------------------------------------------------------------------|-------------------------------------------------------------------------------------------------------------------------------------------------------------------------------------------------------------------------------------------------------------------------------------------------------------------------------------------------------------------------------------------------------------------------------------------------------------------------------------------------------------------------------------------------------------------------------------------------------------------------------------------------------------------------------------------------------------------------------------------------------------------------------------------------------------|--------------------------------------------------------------------------------------------------------------------------------------------------------------------------------------------------------------------------------------------------------------------------------------------------------------------------------------------------------------------------------------------------------------------------------------------------------------------------------------------------------------------------------------------------------------------------------------------------------------------------------------------------------------------------------------------------------------------------------------------------------------------------------------------------------------------------------------------------------------------------------------------------------------------------------------------------------------------------------------------------------------------------------------------------------------------------------------------------------------------------------------------------------------------------------------------------------------------------------------------------------------------------------------------------------------------------------------------------------------------------------------------------------------------------------------------------------------------------------------------------------------------------------------------------------------------------------------------------------------------------------------------------------------------------------------------------------------------------------------------------------------------------------------------------------------------------------------------------------------------------------------------------------------------------------------------------------------------------------|
| <p><b>North America</b> (Leopold et al., 1966; Dietrich and Dunne, 1978; Trimble, 1983; Sutherland, 1991; Allmendinger et al., 2007)</p> <p><b>South America</b> (Meade et al., 1990; Trauth et al., 2003)</p> <p><b>Europe</b> (Macaire et al., 2002; Gruszowski et al., 2003; Belyaev et al., 2005; Evans and Warburton., 2005; Houben et al., 2006; Rommens et al., 2006; Van der Perk and Jetten, 2006)</p> <p><b>Asia</b> (Schick and Lekach, 1993; Oguchi, 1997)</p> <p><b>Africa</b> (Dunne, 1979; Sutherland and Bryan, 1991; Wijdenes, and Bryan, 2001; Walling et al., 2003; Garcin et al., 2005),</p> <p><b>Australia</b> (Loughran et al., 1992; Brizga and Finlayson, 1994; Page et al., 1994; Wasson et al., 1998; Wallbrink et al., 2002)</p> <p><b>Antarctica</b> (Pollard and DeConto, 2003)</p> | <p><b>m<sup>2</sup></b> (Brunton and Bryan, 2000)</p> <p><b>ha</b> (Sutherland, 1991; Wijdenes and Bryan, 2001; Wallbrink et al., 2002; Polyakov et al., 2004; Evans and Warburton., 2005; Hart and Schurger, 2005)</p> <p><b>10 - 100's km<sup>2</sup></b> (Trimble, 1983; Oguchi, 1997; Slaymaker et al., 2003; Walling et al., 2003; Garcin et al., 2005)</p> <p><b>&gt;1,000 km<sup>2</sup></b> (Meade et al., 1990; Brizga and Finlayson, 1994; Houben et al., 2006)</p> | <p><b>days</b> (Page et al., 1994; Springer et al. 2001; Van der Perk and Jetten, 2006)</p> <p><b>months</b> (Sutherland and Bryan, 1991; Polyakov et al., 2004; Belyaev et al., 2005)</p> <p><b>years</b> (Leopold et al., 1966; Schick and Lekach, 1993; Gruszowski et al., 2003; Rovira et al., 2005)</p> <p><b>centuries</b> (Trimble, 1983; Wasson et al., 1998)</p> <p><b>millennia</b> (Oguchi, 1997; Macaire et al., 2002; Slaymaker et al., 2003; Houben et al., 2006; Rommens et al., 2006)</p> | <p><b>field measurements</b> (Leopold et al., 1966; Sutherland and Bryan, 1991; Evans and Warburton, 2005; Rovira et al., 2005)</p> <p><b>radionuclides</b> (Ritchie et al., 1974; Sutherland, 1991; Wallbrink et al., 2002; Walling et al., 2003)</p> <p><b>multiple geochemical fingerprints</b> (Walling and Woodward, 1992; Nimz, 1998; Wasson et al., 2002; Gruszowski et al., 2003; Walling, 2005)</p> <p><b>pond and lake sedimentation</b> (Foster et al., 1988; Erskine et al., 2002; Phippen and Wohl, 2003)</p> <p><b>sediment cores</b> (Slaymaker et al., 2003; Belyaev et al., 2005; Houben et al., 2006; Rommens et al., 2006),</p> <p><b>models</b> (Belyaev et al., 2005)</p> <p><b>maps and photogrammetry</b> (Brizga and Finlayson, 1994; Wasson et al., 1998; Garcin et al., 2005)</p> | <p>Allmendinger et al., 2007 (<b>50 to &gt;100%</b>); Belyaev et al., 2005) (<b>presented errors for <sup>137</sup>Cs ±17%</b>);</p> <p>Brizga and Finlayson, 1994 (<b>nr</b>); Brunton and Bryan, 2000 (<b>nr</b>); Dietrich and Dunne, 1978 (<b>nr, except for measurements on hollows where uncertainty is plotted</b>);</p> <p>Dunne, 1979 (<b>nr</b>); Erskine et al., 2002 (<b>nr</b>); Evans and Warburton., 2005)(<b>±4% to over ±1,000%</b>);</p> <p>Foster et al., 1988 (<b>nr</b>); Garcin et al., 2005) (<b>volume estimates ±10%</b>); Graf, 1987 (<b>±10% to ±50%</b>); Gruszowski et al., 2003 (<b>nr</b>); Houben et al., 2006 (<b>nr</b>); Leopold et al., 1966 (<b>qualitative</b>); Loughran et al., 1992 (<b>nr</b>); Macaire et al., 2002 (<b>nr</b>); Oguchi, 1997(<b>nr</b>); Page et al., 1994 (<b>±10%</b>); Phippen and Wohl, 2003 ) (<b>nr</b>); Pollard and DeConto, 2003 (<b>nr</b>); Polyakov et al., 2004 (<b>nr</b>); Ritchie et al., 1974 (<b>nr</b>); Rommens et al., 2006)(<b>&lt;±1% to ±191%</b>); Rovira et al., 2005) (<b>±15 to ±56%</b>); Schick and Lekach, 1993 (<b>overestimation of sediment loads in the first decade of study by a factor of 2 to 4</b>);</p> <p>Slaymaker et al., 2003 (<b>nr</b>); Springer et al. 2001(<b>nr</b>); Sutherland and Bryan, 1991 (<b>sediment output 6% greater than inputs minus storage</b>); Sutherland, 1991) (<b>statistical errors reported with respect to Cesium-137 activity in the samples but not for the sediment budget</b>); Trauth et al., 2003 (<b>±10 to ±15%</b>); Trimble, 1983 (<b>nr</b>); Van der Perk and Jetten, 2006(<b>nr</b>); Wallbrink et al., 2002)(<b>± 10%, uncertainties in lab analysis is presented as one standard error</b>);</p> <p>Walling and Woodward, 1992 (<b>nr</b>); Walling et al., 2003 (<b>nr</b>); Walling, 2005 (<b>10%</b>); Wasson et al., 1998 (<b>±6 to ±76%</b>); Wijdenes and Bryan, 2001 (<b>qualitative assessment of errors</b>)</p> |

SUPPLEMENTARY TABLE DR2. DATA-COLLECTION METHODS USED IN QUANTIFYING THE SEDIMENT BUDGET FOR VOLCANO HILL WASH AND ARROYO CHAVEZ, 1995-98 [LOCATION OF COLLECTION DEVICES IS SHOWN IN FIGURES 4a,b]

| Measurement Type               | Design and Computation                                                                                                                                                                                                                                                                                                                                                                                                                                                                                                                                                                                                                                                                                                                                                                                                                                                                                                                                                                                                                                                                                                                                                                                                                                                                                                                                                                                                                                                                                                                                                                                                                                                                                                                                                                                                                                                                                                                                                      | Number installed in Volcano Hill Wash | Number installed in Arroyo Chavez | Reference                                    |
|--------------------------------|-----------------------------------------------------------------------------------------------------------------------------------------------------------------------------------------------------------------------------------------------------------------------------------------------------------------------------------------------------------------------------------------------------------------------------------------------------------------------------------------------------------------------------------------------------------------------------------------------------------------------------------------------------------------------------------------------------------------------------------------------------------------------------------------------------------------------------------------------------------------------------------------------------------------------------------------------------------------------------------------------------------------------------------------------------------------------------------------------------------------------------------------------------------------------------------------------------------------------------------------------------------------------------------------------------------------------------------------------------------------------------------------------------------------------------------------------------------------------------------------------------------------------------------------------------------------------------------------------------------------------------------------------------------------------------------------------------------------------------------------------------------------------------------------------------------------------------------------------------------------------------------------------------------------------------------------------------------------------------|---------------------------------------|-----------------------------------|----------------------------------------------|
| Channel erosion and deposition | <p>Repeat surveys at monumented channel cross sections using a survey level or total station. One or more cross sections were monumented at a reach for a given stream order, but at selected locations it was only feasible to put in one cross section. Channel cross-sectional area is the area of the channel below the two highest points on the left and right bank. These highest points usually correspond to the elevation of the alluvial valley. Changes in cross-sectional area were determined as the difference between the resurvey and the original survey. Positive changes (increases in cross-sectional area) indicate erosion and negative differences indicate deposition. The change in cross-sectional area was averaged for each stream order as follows:</p> $\overline{\Delta m_j} = \left[ \frac{\sum_{i=1}^n \left( \frac{\Delta X S_i}{ND} \right) * 365}{n} \right]$ <p>Where <math>\overline{\Delta m}</math> = average change in cross-sectional area for stream order <math>j</math> (<math>m^2/yr</math>); <math>\overline{\Delta X S_i}</math> = average change in channel cross-sectional area for reach <math>i</math> (<math>m^2</math>); ND is the number of days between resurveys; <math>n</math> = total number of reaches for a given stream order. The average change in cross-sectional area for stream order <math>j</math> was converted to a mass by multiplying by the average sediment density for stream order <math>j</math> (<math>kg/m^3</math>).</p>                                                                                                                                                                                                                                                                                                                                                                                                                                                                 | 50                                    | 36                                | Leopold et al., 1966; Harrelson et al., 1994 |
| Channel scour and fill         | <p>Scour chains, 1.22 meters long, 12.7 mm thick, were placed vertically in a hole dug in the channel bed with the top chain link at or slightly above the bed surface. Depth of scour was measured from the elevation of the channel bed of the initial survey to the elevation of the bend in the resurveyed scour chain. Fill was measured as the vertical elevation difference from the bend in the chain to the channel bed. The depth of scour and fill (m) were measured in the thalweg and the area of scour and fill for the entire cross section was approximated to be triangular (<math>m^2</math>), with maximum scour and fill in the thalweg approaching zero at the channel sides. Because the net change in the elevation of the channel bed is determined from channel cross section resurveys, to avoid duplication, if the channel bed lowered during the study period, the amount of scour and fill was measured relative to the final survey, and if the channel aggraded over time, the amount of scour and fill and was measured relative to the initial survey. Therefore, scour and fill have the same value.</p> <p>The change in cross-sectional area from scour and fill was averaged for each stream order as follows:</p> $SCj \text{ or } FLj = \left( \frac{SCj \text{ or } FLj}{ND} \right) * 365$ <p>Where SC<math>j</math> = the scour area per year for stream order <math>j</math> (<math>m^2/yr</math>); FL<math>j</math> = the fill area per year for stream order <math>j</math> (<math>m^2/yr</math>); SC<math>j</math> = average scour for stream order <math>j</math> (<math>m^2</math>); FL<math>j</math> = average fill for stream order <math>j</math> (<math>m^2</math>); ND = number of days between surveys. The average change in cross-sectional area for stream order <math>j</math> was converted to a mass by multiplying by the average sediment density for stream order <math>j</math> (<math>kg/m^3</math>).</p> | 5                                     | 4                                 | Leopold et al., 1966                         |
| Eolian                         | <p>A 56-cm-diameter, 18.9-L plastic bucket attached to a fence post where the bottom of the bucket was placed at a distance of 2 m above the ground. A wire net filled with marbles was placed <math>\frac{1}{4}</math> of the distance from the top of the bucket. At collection, the marbles were rinsed and the wash was collected in the bucket, transferred, and later dried. The eolian material deposited in each watershed was calculated as follows:</p> $Te = \frac{\sum_{i=1}^n \left( \frac{Emi}{ND} \right)}{Ab} * 365$ <p>Where Te = total eolian deposition (<math>\frac{kg}{m^2 \cdot yr}</math>) for a given basin; Emi = total eolian mass deposited (kg) for the collection period in eolian trap <math>i</math>; ND= number of days eolian trap <math>i</math> operated; <math>n</math>=number of eolian collectors; Ab=area of collection bucket (<math>0.246 \text{ m}^2</math>).</p>                                                                                                                                                                                                                                                                                                                                                                                                                                                                                                                                                                                                                                                                                                                                                                                                                                                                                                                                                                                                                                                                 | 3                                     | 8                                 | Reheis and Kihl (1995)                       |
| Infiltration                   | <p>Infiltration (mm/hr) was measured using a single-ring infiltrometer made of steel or polyvinylchloride (PVC), 20-cm-diameter by 20-cm length cylinder. The cylinder was pushed into the ground and water was poured into the cylinder. A falling head test was performed where the depth of water in the cylinder was measured over time with a ruler placed along the side of the cylinder. As the water depth approached the ground surface, additional water was added until a steady infiltration rate was observed. Measurements were made in the bounded area of sediment traps.</p>                                                                                                                                                                                                                                                                                                                                                                                                                                                                                                                                                                                                                                                                                                                                                                                                                                                                                                                                                                                                                                                                                                                                                                                                                                                                                                                                                                               |                                       |                                   | (Wu and Pan, 1997; Dunne and Leopold, 1978)  |

SUPPLEMENTARY TABLE DR2. CONTINUED

| Measurement Type                           | Design and Computation                                                                                                                                                                                                                                                                                                                                                                                                                                                                                                                                                                                                                                                                                                                                                                                                                                                                                                                                                                                                                                                                                                                                                                                                                                                                                                                                                                                                                                 | Number installed in Volcano Hill Wash | Number installed in Arroyo Chavez | Reference                                                                                        |
|--------------------------------------------|--------------------------------------------------------------------------------------------------------------------------------------------------------------------------------------------------------------------------------------------------------------------------------------------------------------------------------------------------------------------------------------------------------------------------------------------------------------------------------------------------------------------------------------------------------------------------------------------------------------------------------------------------------------------------------------------------------------------------------------------------------------------------------------------------------------------------------------------------------------------------------------------------------------------------------------------------------------------------------------------------------------------------------------------------------------------------------------------------------------------------------------------------------------------------------------------------------------------------------------------------------------------------------------------------------------------------------------------------------------------------------------------------------------------------------------------------------|---------------------------------------|-----------------------------------|--------------------------------------------------------------------------------------------------|
| Rainfall                                   | Manual rain gages and automatic tipping bucket rain gages recording at 15-minute intervals, each mounted on poles approximately 1.5 m off the ground.                                                                                                                                                                                                                                                                                                                                                                                                                                                                                                                                                                                                                                                                                                                                                                                                                                                                                                                                                                                                                                                                                                                                                                                                                                                                                                  | 6                                     | 4                                 |                                                                                                  |
| Sheetwash                                  | <p>Sediment traps were made of sheet metal that was 85 cm long and 13 cm deep (fig.5b), with the exception of traps 5b and 7b in Arroyo Chavez, which were 65 cm long and 13 cm deep. To prevent precipitation from entering the trap directly, a lid made of sheet metal was fitted with a hinge to the back of the trap. One to three 1.27- cm-diameter holes were drilled into the side of the trap, and were connected by tubing to 18.9 L collection buckets. The traps were installed flush to the ground surface with the opening parallel to the slope contour. The contributing area was bounded with metal edging. Total station surveys of the traps were performed to determine their contributing area and ground surface slope.</p> <p>Sediment was collected in the buckets after one or more rainfall events during the study period. Each bucket was weighed in the lab to determine total runoff (sediment and water). Total runoff was converted to a volume (L) by assuming the density of the sediment-water mixture was 1.0 g/ ml. In the laboratory. After sitting for 1 month, water was decanted from the buckets and the sediment was oven dried for 24 h at 98°C. Samples of the water before decanting were taken, dried in a bowl, and weighed to determine the amount of sediment still remaining in suspension. This amount was extrapolated to the total volume of runoff and added to the total mass of sediment.</p> | 8                                     | 10                                | Gerlach, 1967; Gellis, 1998                                                                      |
| Sheetwash                                  | <p>Straw dams made of straw bales were piled in a 1-m hole dug in the channel of zero-order drainages (fig. 5c). The bales were secured into the ground with steel rebar, and large rocks were piled on the downstream side of the straw bales to prevent the bales from toppling. The sediment pool on the upstream side of the straw bales was dug out, and four to six cross sections were monumented in the pool using steel rebar and surveyed periodically to quantify sediment deposition. The mass of sediment deposited behind the dams was determined as the product of the volume of deposited sediment (m<sup>3</sup>) over time by the density of deposited sediment (kg/m<sup>3</sup>). The contributing areas to the straw dams were surveyed with a total station. Sediment yield of each dam was computed as:</p> $SY_d = \left[ \frac{(TS_d)}{Ad} \right] \times 365$ <p>Where SY<sub>d</sub> = sediment yield (<math>\frac{kg}{m^2 \cdot yr}</math>); TS<sub>d</sub> = total sediment deposited behind dam <i>d</i> (kg); ND = total number of days operating; Ad= contributing area to the dam (m<sup>2</sup>).</p>                                                                                                                                                                                                                                                                                                                | 4                                     | 3                                 |                                                                                                  |
| Sheetwash                                  | A 15-cm-long nail was put through a washer and driven in the ground with the top of the nail leaving a small measured distance above the washer, which was flush to the ground (fig. 5a). Deposition is the amount of sediment deposited over the washer. Erosion is the difference from the nail head to the top of the washer. The net change in the surface is the difference of the two. Each nail/washer was placed at set intervals and along major breaks in slope, and arrayed in a line. The measurements of erosion and deposition, which are made at a point, were extrapolated to halfway to the distance of the next nail/washer. The net amount of erosion and deposition for each line was weighted by the distance each nail/washer segment represents relative to the total distance of the line and summed.                                                                                                                                                                                                                                                                                                                                                                                                                                                                                                                                                                                                                          | 14 lines                              | 45 lines                          | Miller and Leopold, 1961; Leopold et al., 1966                                                   |
| Suspended-sediment concentration and loads | Isokinetic samplers and automatic samplers were used to collect suspended-sediment samples. Streamflow, sediment-data collection, and computation followed U.S. Geological Survey guidelines). Suspended-sediment loads were computed using the subdivision method and the USGS software Program GCLAS.                                                                                                                                                                                                                                                                                                                                                                                                                                                                                                                                                                                                                                                                                                                                                                                                                                                                                                                                                                                                                                                                                                                                                | 1 station                             | 1 station                         | Carter and Davidian, 1968; Porterfield, 1972; Edwards and Glysson, 1999; McKallip et al., 2001). |
| Vegetative cover                           | A 100-cm diameter plastic hoop was placed on permanent markers (pins in the ground) to estimate vegetative cover percentage and species. In addition to the monumented measurements of vegetation, two random tosses of the hoop were made at each visit and an estimate of the entire vegetation density in the trap's contributing area was made.                                                                                                                                                                                                                                                                                                                                                                                                                                                                                                                                                                                                                                                                                                                                                                                                                                                                                                                                                                                                                                                                                                    |                                       |                                   |                                                                                                  |

SUPPLEMENTARY TABLE DR3. CHANNEL, HYDROLOGIC, AND SEDIMENTOLOGIC DATA INPUT TO THE BEDLOAD ASSESSMENT FOR GRAVEL-BED STREAMS (BAGS) MODEL FOR (A) VOLCANO HILL WASH AND (B) ARROYO CHAVEZ.

(A) VOLCANO HILL WASH INPUT TO BAGS MODEL

| VOLCANO HILL CHANNEL INPUTS  |                        |
|------------------------------|------------------------|
| Channel bed slope            | 0.0075                 |
| Minimum water discharge      | 0.01 m <sup>3</sup> /s |
| Maximum water discharge      | 12.3 m <sup>3</sup> /s |
| Left floodplain boundary     | 18.14 m                |
| Left floodplain Manning's n  | 0.07                   |
| Right floodplain boundary    | 42.5 m                 |
| Right floodplain Manning's n | 0.07                   |

| VOLCANO HILL CROSS SECTION GEOMETRY |               |                                     |               |
|-------------------------------------|---------------|-------------------------------------|---------------|
| Lateral distance from left bank (m) | Elevation (m) | Lateral distance from left bank (m) | Elevation (m) |
| 0                                   | 1744.1        | 26.5                                | 1742.6        |
| 1.4                                 | 1744.1        | 27.3                                | 1742.6        |
| 2.4                                 | 1744          | 27.6                                | 1742.5        |
| 2.9                                 | 1743.9        | 28.8                                | 1742.5        |
| 4.4                                 | 1743.7        | 30.3                                | 1742.5        |
| 5.9                                 | 1743.6        | 31.3                                | 1742.5        |
| 7.5                                 | 1743.4        | 31.9                                | 1742.5        |
| 9.0                                 | 1743.3        | 32.5                                | 1742.5        |
| 12.0                                | 1743.2        | 33.4                                | 1742.8        |
| 15.1                                | 1743.2        | 33.9                                | 1742.9        |
| 16.6                                | 1743.2        | 34.9                                | 1743          |
| 18.1                                | 1743.2        | 36.4                                | 1743.6        |
| 18.5                                | 1743.2        | 38.1                                | 1743.8        |
| 19.6                                | 1742.9        | 38.7                                | 1743.9        |
| 20.6                                | 1742.9        | 39.4                                | 1743.9        |
| 21.2                                | 1742.8        | 42.5                                | 1744.3        |
| 21.9                                | 1742.7        | 45.6                                | 1744.4        |
| 22.7                                | 1742.7        | 48.6                                | 1744.5        |
| 24.2                                | 1742.7        | 48.8                                | 1744.5        |
| 25.8                                | 1742.7        |                                     |               |

| VOLCANO HILL SURFACE GRAIN SIZE DISTRIBUTION |         |           |         |
|----------------------------------------------|---------|-----------|---------|
| Size (mm)                                    | % Finer | Size (mm) | % Finer |
| 0.06                                         | 2.0     | 8.0       | 90.8    |
| 0.36                                         | 26.7    | 11.2      | 93.6    |
| 0.50                                         | 35.6    | 16.0      | 95.9    |
| 0.71                                         | 45.3    | 22.4      | 97.8    |
| 1.0                                          | 54.8    | 31.5      | 99.2    |
| 1.4                                          | 63.0    | 45.0      | 100     |
| 2.0                                          | 71.5    | 63.0      | 100     |
| 2.8                                          | 77.7    | 90.0      | 100     |
| 4.0                                          | 84.3    | 128       | 100     |
| 5.6                                          | 87.5    | 256       | 100     |

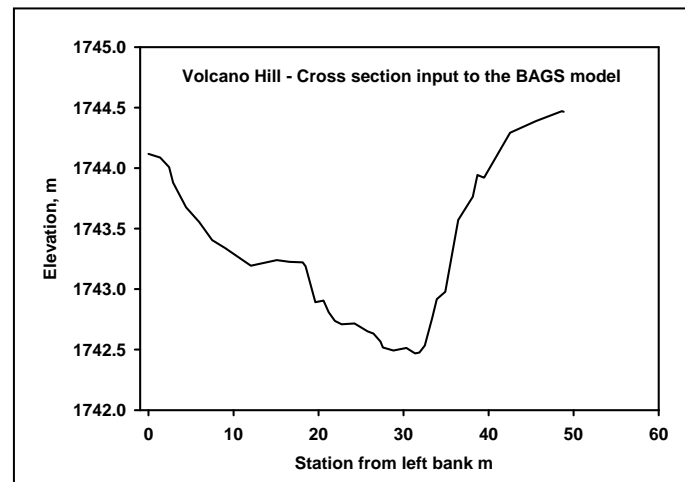

SUPPLEMENTARY TABLE DR3A. CONTINUED

| VOLCANO HILL - STATISTICS OF THE ABOVE<br>GRAIN SIZE DISTRIBUTION |      |
|-------------------------------------------------------------------|------|
| Geometric mean (mm)                                               | 0.9  |
| Geometric standard deviation                                      | 4.2  |
| D10 (mm)                                                          | 0.1  |
| D16 (mm)                                                          | 0.2  |
| D25 (mm)                                                          | 0.3  |
| D50 (mm)                                                          | 0.8  |
| D65 (mm)                                                          | 1.5  |
| D75 (mm)                                                          | 2.4  |
| D84 (mm)                                                          | 3.9  |
| D90 (mm)                                                          | 7.3  |
| Main channel Manning's n                                          | 0.02 |

SUPPLEMENTARY TABLE DR3.  
B) ARROYO CHAVEZ INPUT TO BAGS MODEL

| ARROYO CHAVEZ CHANNEL INPUTS |                        |
|------------------------------|------------------------|
| Channel bed slope            | 0.0108                 |
| Min. water discharge         | 0.01 m <sup>3</sup> /s |
| Max. water discharge         | 8.24 m <sup>3</sup> /s |
| Left floodplain boundary     | 17.4 m                 |
| Left floodplain Manning's n  | 0.07                   |
| Right floodplain boundary    | 21.5 m                 |
| Right floodplain Manning's n | 0.07                   |

| ARROYO CHAVEZ CROSS SECTION GEOMETRY         |                  |                                              |               |
|----------------------------------------------|------------------|----------------------------------------------|---------------|
| Lateral<br>distance<br>from left<br>bank (m) | Elevation<br>(m) | Lateral<br>distance<br>from left<br>bank (m) | Elevation (m) |
| 0.2                                          | 1939.3           | 21.5                                         | 1938.5        |
| 2.3                                          | 1939.1           | 22.5                                         | 1938.4        |
| 2.7                                          | 1938.9           | 23.2                                         | 1938.3        |
| 3.0                                          | 1938.9           | 23.5                                         | 1938.3        |
| 6.1                                          | 1938.7           | 24.4                                         | 1938.4        |
| 9.1                                          | 1938.6           | 24.9                                         | 1938.6        |
| 12.2                                         | 1938.6           | 25.9                                         | 1938.6        |
| 15.2                                         | 1938.7           | 26.8                                         | 1938.5        |
| 17.6                                         | 1938.6           | 27.4                                         | 1938.5        |
| 18.3                                         | 1938.2           | 28.3                                         | 1938.5        |
| 18.5                                         | 1938.1           | 29.8                                         | 1938.7        |
| 18.8                                         | 1937.7           | 30.5                                         | 1938.7        |
| 19.6                                         | 1937.3           | 32.3                                         | 1938.9        |
| 20.1                                         | 1937.4           | 32.5                                         | 1939.3        |
| 20.7                                         | 1938.1           | 33.5                                         | 1939.4        |
| 21.3                                         | 1938.3           |                                              |               |

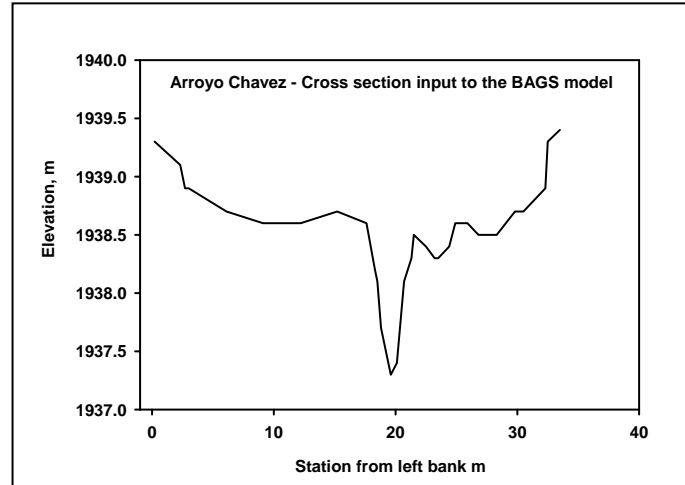

SUPPLEMENTARY TABLE DR3B. CONTINUED

| ARROYO CHAVEZ SURFACE GRAIN SIZE DISTRIBUTION |         |
|-----------------------------------------------|---------|
| Size (mm)                                     | % Finer |
| 0.06                                          | 0.05    |
| 0.36                                          | 21      |
| 0.5                                           | 26      |
| 0.71                                          | 28.5    |
| 1.0                                           | 31      |
| 1.4                                           | 36      |
| 2.0                                           | 41      |
| 2.8                                           | 49      |
| 4.0                                           | 58      |
| 5.6                                           | 67      |
| 8.0                                           | 79      |
| 11.2                                          | 89      |
| 16.0                                          | 96.4    |
| 22.4                                          | 100     |
| 31.5                                          | 100     |
| 45.0                                          | 100     |
| 63.0                                          | 100     |
| 90.0                                          | 100     |
| 128                                           | 100     |
| 256                                           | 100     |

| ARROYO CHAVEZ STATISTICS OF THE ABOVE GRAIN SIZE DISTRIBUTION: |      |
|----------------------------------------------------------------|------|
| Geometric mean (mm)                                            | 1.9  |
| Geometric standard deviation                                   | 4.9  |
| D10 (mm)                                                       | 0.1  |
| D16 (mm)                                                       | 0.2  |
| D25 (mm)                                                       | 0.5  |
| D50 (mm)                                                       | 2.9  |
| D65 (mm)                                                       | 5.2  |
| D75 (mm)                                                       | 7.1  |
| D84 (mm)                                                       | 9.5  |
| D90 (mm)                                                       | 11.8 |
| Main channel Manning's n                                       | 0.02 |

SUPPLEMENTARY TABLE DR4. GIS MODEL ACCOUNTING OF CELLS ALONG DRAINAGE PATHWAYS FROM GEOMORPHIC COMPONENTS TO OTHER GEOMORPHIC COMPONENTS AND STREAM ORDERS (m<sup>2</sup>), AND FROM ONE STREAM ORDER TO OTHER STREAM ORDERS (m), IN (A) VOLCANO HILL WASH AND (B) ARROYO CHAVEZ

A) Volcano Hill Wash

|                                       | Mesa      | Steep colluvial | Alluvial-colluvial | CELLS FROM       |                 | 1 <sup>st</sup> order channels | 2 <sup>nd</sup> order channels | 3 <sup>rd</sup> order channels | 4 <sup>th</sup> order channels |
|---------------------------------------|-----------|-----------------|--------------------|------------------|-----------------|--------------------------------|--------------------------------|--------------------------------|--------------------------------|
|                                       |           |                 |                    | Eolian component | Valley alluvium |                                |                                |                                |                                |
| <b>CELLS GOING TO</b>                 |           |                 |                    |                  |                 |                                |                                |                                |                                |
| Mesa                                  |           | 6,702           | 79,600             |                  |                 |                                |                                |                                |                                |
| Steep Colluvial                       | 420,705   |                 | 16,701             |                  |                 |                                |                                |                                |                                |
| Alluvial- colluvial                   | 294,896   | 234,700         |                    | 65,401           |                 |                                |                                |                                |                                |
| Eolian component                      |           | 81,097          | 108,256            |                  |                 |                                |                                |                                |                                |
| Valley alluvium                       |           | 388,303         | 159,353            | 382,102          |                 |                                |                                |                                |                                |
| Channel 1st order                     | 188,805   | 2,285,185       | 824,597            | 416,393          | 163,099         |                                |                                |                                |                                |
| Channel 2nd order                     | 114,697   | 674,303         | 652,501            | 18,400           | 156,899         | 11,844                         |                                |                                |                                |
| Channel 3rd Order                     |           | 21,899          | 85,398             | 66,201           | 420,406         | 2,135                          | 7,870                          |                                |                                |
| Channel 4th Order                     |           |                 |                    |                  | 69,700          | 390                            | 90                             | 4,395                          |                                |
| Out of basin                          |           |                 |                    |                  |                 |                                |                                |                                | 450                            |
| Subtotal                              | 1,019,103 | 3,692,190       | 1,926,406          | 948,497          | 810,104         | 14,370                         | 7,960                          | 4,395                          | 450                            |
| Total area of cells, m <sup>2</sup> * | 8,423,475 |                 |                    |                  |                 |                                |                                |                                |                                |
| Error, m <sup>2</sup> †               | 196,525   |                 |                    |                  |                 |                                |                                |                                |                                |
| Percent error                         | 2.3       |                 |                    |                  |                 |                                |                                |                                |                                |

\* The total area of Volcano Hill Wash was derived from the GIS and does not include the 0.68 km<sup>2</sup> draining to a stock pond.

† Error occurred as a result of cells incorrectly draining out of the basin across the divide.

B) Arroyo Chavez

|                                     | Mesa      | Steep colluvial | Gently sloping | CELLS FROM |                 | 1 <sup>st</sup> order channels | 2 <sup>nd</sup> order channels | 3 <sup>rd</sup> order channels | 4 <sup>th</sup> order channels |
|-------------------------------------|-----------|-----------------|----------------|------------|-----------------|--------------------------------|--------------------------------|--------------------------------|--------------------------------|
|                                     |           |                 |                | Fan        | Valley alluvium |                                |                                |                                |                                |
| <b>CELLS GOING TO</b>               |           |                 |                |            |                 |                                |                                |                                |                                |
| Steep colluvial                     | 211,800   |                 |                |            |                 |                                |                                |                                |                                |
| Gently                              | 100       | 9,000           |                |            | 1,500           |                                |                                |                                |                                |
| Fan                                 | 22,100    | 98,700          | 86,900         |            | 9,580           |                                |                                |                                |                                |
| Valley alluvium                     | 33,800    | 38,700          | 175,100        | 105,300    |                 |                                |                                |                                |                                |
| 1st order channels                  | 127,200   | 75,200          | 156,600        | 73,600     | 305,400         |                                |                                |                                |                                |
| 2nd order channels                  |           | 25,200          | 2,300          | 45,600     | 281,320         | 3,500                          |                                |                                |                                |
| 3rd order channels                  |           |                 | 1,800          | 11,600     | 179,100         | 1,100                          | 3,080                          |                                |                                |
| 4 <sup>th</sup> order channels      |           |                 |                |            | 30,200          | 80                             | 360                            | 1,710                          |                                |
| Out of basin                        |           |                 |                |            |                 |                                |                                |                                | 270                            |
| Subtotal                            | 395,000   | 246,800         | 422,700        | 236,100    | 807,100         | 4,680                          | 3,440                          | 1,710                          | 270                            |
| Total area of cells, m <sup>2</sup> | 2,117,800 |                 |                |            |                 |                                |                                |                                |                                |
| Error, m <sup>2</sup> †             | 7,800     |                 |                |            |                 |                                |                                |                                |                                |
| Percent error                       | 0.4       |                 |                |            |                 |                                |                                |                                |                                |

† Error occurred as a result of cells in correctly draining out of the basin across the divide.

SUPPLEMENTARY TABLE DR5. SUMMARY OF SOIL DENSITY MEASUREMENTS FOR THE GEOMORPHIC COMPONENTS IN: (A) VOLCANO HILL WASH AND (B) ARROYO CHAVEZ

A) Arroyo Chavez

| Geomorphic Component   | Number of samples | Average soil density (kg/m <sup>3</sup> ) | Range       | Standard Deviation |
|------------------------|-------------------|-------------------------------------------|-------------|--------------------|
| Mesa                   | 2                 | 1,281                                     | 1,239-1,323 |                    |
| Steep colluvial slopes | 8                 | 1,396                                     | 1,220-1,669 | 156                |
| Alluvium/ Colluvium    | 8                 | 1,488                                     | 1,091-1,746 | 221                |
| Eolian                 | 2                 | 1,224                                     | 1,126-1,323 |                    |
| Valley Alluvium        | 4                 | 1,153                                     | 1,054-1,490 | 144                |

B) Volcano Hill Wash

| Geomorphic Component | Number of samples | Average soil density (kg/m <sup>3</sup> ) | Range       | Standard Deviation |
|----------------------|-------------------|-------------------------------------------|-------------|--------------------|
| Mesa                 | 12                | 1,262                                     | 1,037-1,366 | 100                |
| Steep Colluvial      | 4                 | 1,251                                     | 1,217-1,289 | 38                 |
| Moderately sloping   | 2                 | 1,229                                     | 1,113-1,345 |                    |
| Fan                  | 4                 | 1,271                                     | 1,168-1,331 | 75                 |
| Valley Alluvium      | 6                 | 1,341                                     | 1,143-1,492 | 130                |

SUPPLEMENTARY TABLE DR6. SUMMARY OF POSSIBLE MEASUREMENT UNCERTAINTY FOR VARIOUS MEASUREMENTS MADE IN THIS SEDIMENT BUDGET

| Measurement Technique                          | Problem With Measurement Technique                                                                                                                                        | Effect of Measurement Error on the Sediment Delivered out of the Watershed<br>(+) Increases the amount<br>(-) Decreases the amount             |
|------------------------------------------------|---------------------------------------------------------------------------------------------------------------------------------------------------------------------------|------------------------------------------------------------------------------------------------------------------------------------------------|
| Nails                                          | Freeze thaw of ground surface                                                                                                                                             | +                                                                                                                                              |
| Traps                                          | Overflow of traps during runoff event                                                                                                                                     | -                                                                                                                                              |
| Dams                                           | Overflow of dams during runoff event; bedload may be a percentage of the deposited sediment                                                                               | + / -                                                                                                                                          |
| Suspended-sediment measurement at basin outlet | Estimation of sediment concentrations for missed events                                                                                                                   | Compared to computed loads, estimated suspended-sediment loads at Volcano Hill Wash were +59% and -34% and Arroyo Chavez were +51% and -50%    |
| Suspended sediment                             | Automatic samples were not calibrated to cross-sectional samples                                                                                                          | + / -                                                                                                                                          |
| Bedload                                        | Bedload estimated with the BAGS model was not calibrated                                                                                                                  | + / -                                                                                                                                          |
| Sediment delivery                              | Extrapolation of sediment-delivery curve (SDR) to greater areas than was used in the construction of the SDR curve.                                                       | + / -                                                                                                                                          |
| Overall sediment budget                        | Extrapolating field measurements made at small scales to larger scales; effect of extrapolating results of 3-year study to longer periods of time                         | + / -                                                                                                                                          |
| GIS model                                      | Effect of cells flowing out of the basin                                                                                                                                  | -0.4 to -2.3%                                                                                                                                  |
| Soil density                                   | Soil density measurements are spatially and temporally variable                                                                                                           | Average, range, and standard deviation of soil and channel density measurements are presented in Supplementary Tables DR5, DR7, DR8, and DR10. |
| Channel scour and fill                         | We recognize that scour and fill can be quite variable and that averaging one of more measurements and extrapolating this to that entire stream order can lead to errors. | + / -                                                                                                                                          |
| Eolian collection                              | Eolian material could have originated from within the drainage basin.                                                                                                     | +                                                                                                                                              |

SUPPLEMENTARY TABLE DR7. SUMMARY OF SEDIMENT TRAP DATA FOR (A) VOLCANO HILL WASH AND (B) ARROYO CHAVEZ.

## A) Volcano Hill Wash

| Geomorphic component        | Trap ID | Collection Dates<br>Start End | Number of sampled events | Number of estimated events | Slope of contributing area % | Average vegetation density (%) | Infiltration rate (mm/hr), (number of measurements) | Runoff yield (L/m <sup>2</sup> /yr) | Total Rain fall (mm) | Contributing area (m <sup>2</sup> ) | Soil Density (kg/m <sup>3</sup> ) | Sediment concentration (ppm) | Sediment yield (kg/m <sup>2</sup> /yr) | Erosion (mm/yr) |
|-----------------------------|---------|-------------------------------|--------------------------|----------------------------|------------------------------|--------------------------------|-----------------------------------------------------|-------------------------------------|----------------------|-------------------------------------|-----------------------------------|------------------------------|----------------------------------------|-----------------|
| Valley alluvium             | t1      | 6/6/1996 10/5/1998            | 37                       | 2                          | 5                            | 4                              | 67(1)                                               | 36,060                              | 520                  | 7.15                                | 1,054                             | 25,320                       | 0.91                                   | 0.87            |
| Steep Colluvial             | t2      | 6/6/1996 10/5/1998            | 31                       | 2                          | 21                           | 17                             | NA                                                  | 5,780                               | 596                  | 4.79                                | 1,669                             | 8,740                        | 0.05                                   | 0.03            |
| Valley alluvium             | t3      | 6/6/1996 10/5/1998            | 42                       | 2                          | 8                            | 8                              | 94(2)                                               | 22,050                              | 520                  | 6.40                                | 1,490                             | 9,170                        | 0.22                                   | 0.14            |
| Eolian                      | t4      | 6/6/1996 10/5/1998            | 34                       | 2                          | 6                            | 19                             | 94(2)                                               | 14,970                              | 520                  | 8.31                                | 1,224                             | 4,170                        | 0.06                                   | 0.05            |
| Alluvial-colluvial          | t5      | 6/4/1996 10/5/1998            | 30                       | 5                          | 6                            | 23                             | 80(2)                                               | 14,760                              | 566                  | 9.73                                | 1,314                             | 13,200                       | 0.20                                   | 0.15            |
| Alluvial-colluvial          | t6      | 6/4/1996 10/5/1998            | 36                       | 1                          | 10                           | 10                             | NA                                                  | 27,570                              | 566                  | 4.69                                | 1,671                             | 6,730                        | 0.18                                   | 0.11            |
| Alluvial-colluvial          | t7      | 6/6/1996 10/5/1998            | 30                       | 4                          | 11                           | 14                             | 185(2)                                              | 16,300                              | 566                  | 6.57                                | 1,498                             | 7,410                        | 0.12                                   | 0.08            |
| Mesa                        | t8      | 6/6/1996 10/5/1998            | 33                       | 1                          | 11                           | 33                             | 109(3)                                              | 21,620                              | 621                  | 5.79                                | 1,281                             | 14,370                       | 0.31                                   | 0.24            |
| Average of all measurements |         |                               |                          |                            |                              | 17                             | 108(12)                                             | 20,060                              |                      |                                     | 1,371                             |                              |                                        |                 |
| Range                       |         |                               |                          |                            |                              | 0-70                           | 57-209                                              | 5,780-36,060                        |                      |                                     | 1,054-1,746                       |                              |                                        |                 |
| Standard Deviation          |         |                               |                          |                            |                              | 11                             | 47                                                  | 8,650                               |                      |                                     | 258                               |                              |                                        |                 |

## B) Arroyo Chavez

| Geomorphic component        | Trap ID | Collection Dates<br>Start End | Number of sampled events | Number of estimated events | Slope of contributing area % | Average vegetation density (%) | Infiltration rate (mm/hr), (number of measurements) | Runoff yield (L/m <sup>2</sup> /yr) | Total Rain fall (mm) | Contributing area (m <sup>2</sup> ) | Soil Density (kg/m <sup>3</sup> ) | Sediment concentration (ppm) | Sediment yield (kg/m <sup>2</sup> /yr) | Erosion (mm/yr) |
|-----------------------------|---------|-------------------------------|--------------------------|----------------------------|------------------------------|--------------------------------|-----------------------------------------------------|-------------------------------------|----------------------|-------------------------------------|-----------------------------------|------------------------------|----------------------------------------|-----------------|
| Mesa                        | t1      | 5/16/1996 10/02/1998          | 45                       | 0                          | 11                           | 11                             | 118(3)                                              | 7,930                               | 687                  | 36.7                                | 1,301                             | 28,550                       | 0.23                                   | 0.17            |
| Steep colluvial             | t2      | 5/16/1996 10/02/1998          | 38                       | 1                          | 45                           | 12                             | NA                                                  | 12,310                              | 687                  | 7.9                                 | 1,254                             | 13,900                       | 0.17                                   | 0.14            |
| Mesa                        | t3      | 5/16/1996 10/02/1998          | 47                       | 2                          | 10                           | 21                             | 89(3)                                               | 6,010                               | 700                  | 35.3                                | 1,300                             | 57,360                       | 0.34                                   | 0.26            |
| Fan                         | t4      | 5/16/1996 10/02/1998          | 50                       | 1                          | 14                           | 42                             | 270(3)                                              | 11,130                              | 687                  | 27.4                                | 1,293                             | 81,680                       | 0.91                                   | 0.7             |
| Valley alluvium             | t5      | 5/16/1996 10/02/1998          | 58                       | 0                          | 13                           | 6                              | 69(3)                                               | 23,200                              | 789                  | 27.3                                | 1,143                             | 139,990                      | 3.25                                   | 2.84            |
| Valley alluvium             | t6      | 3/5/1997 10/02/1998           | 33                       | 0                          | 14                           | 17                             | NA                                                  |                                     | 603                  | 0.8                                 | 1,143                             |                              | 1.12                                   | 0.98            |
| Valley alluvium             | t7      | 5/16/1996 10/02/1998          | 31                       | 5                          | 6                            | 33                             | 138(3)                                              | 18,110                              | 917                  | 6.4                                 | 1,314                             | 8,050                        | 0.15                                   | 0.11            |
| Moderately sloping          | t8      | 5/16/1996 10/02/1998          | 43                       | 7                          | 7                            | 24                             | 99(2)                                               | 12,290                              | 894                  | 27.6                                | 1,113                             | 15,830                       | 0.19                                   | 0.14            |
| Moderately sloping          | t9      | 3/5/1997 10/02/1998           | 27                       | 3                          | NA                           | 30                             | NA                                                  |                                     | 790                  | 1.7                                 | 1,113                             |                              | 0.26                                   | 0.2             |
| Moderately sloping          | t10     | 5/16/1996 10/02/1998          | 41                       | 0                          | 29                           | 28                             | 102(3)                                              | 5,670                               | 1,016                | 21.8                                | 1,345                             | 25,100                       | 0.14                                   | 0.11            |
| Average of all measurements |         |                               |                          |                            |                              | 20                             | 128(21)                                             |                                     |                      |                                     | 1,272                             |                              |                                        |                 |
| Range                       |         |                               |                          |                            |                              | 0-85                           | 12-287                                              |                                     |                      |                                     | 1,113-1,345                       |                              |                                        |                 |
| Standard Deviation          |         |                               |                          |                            |                              | 16                             | 80                                                  |                                     |                      |                                     | 78                                |                              |                                        |                 |

SUPPLEMENTARY TABLE DR8. SUMMARY OF EROSION MEASUREMENTS USING STRAW DAMS: (A) VOLCANO HILL WASH AND (B) ARROYO CHAVEZ.

A) Volcano Hill Wash

| Geomorphic component        | Site ID | Collection Dates |            | Drainage area, (m <sup>2</sup> ) | Sediment density (kg/m <sup>3</sup> ) | Sediment Yield (kg/m <sup>2</sup> /yr) | Erosion (mm/yr) |
|-----------------------------|---------|------------------|------------|----------------------------------|---------------------------------------|----------------------------------------|-----------------|
|                             |         | Start            | End        |                                  |                                       |                                        |                 |
| Steep Colluvial             | d1      | 7/27/1995        | 11/11/1998 | 5,172                            | 1,451                                 | 0.04                                   | 0.03            |
| Valley alluvium             | d2      | 7/28/1995        | 11/11/1998 | 422                              | 1319                                  | 0.39                                   | 0.30            |
| Steep Colluvial             | d3      | 8/7/1995         | 11/13/1998 | 4,999                            | 1,378                                 | 0.06                                   | 0.04            |
| Steep Colluvial             | d4      | 7/8/1995         | 11/13/1998 | 2,507                            | 1,317                                 | 0.02                                   | 0.02            |
| Average of all measurements |         |                  |            |                                  | 1,373                                 |                                        |                 |
| Range                       |         |                  |            |                                  | 1,287-1,563                           |                                        |                 |
| Standard Deviation          |         |                  |            |                                  | 103                                   |                                        |                 |

(B) Arroyo Chavez

| Geomorphic component        | Site ID | Collection Dates |            | Drainage area, (m <sup>2</sup> ) | Sediment density (kg/m <sup>3</sup> ) | Sediment Yield (kg/m <sup>2</sup> /yr) | Erosion (mm/yr) |
|-----------------------------|---------|------------------|------------|----------------------------------|---------------------------------------|----------------------------------------|-----------------|
|                             |         | Start            | End        |                                  |                                       |                                        |                 |
| Mesa                        | d1      | 8/1/1995         | 11/20/1998 | 2,276                            | 1,307                                 | 0.38                                   | 0.29            |
| Mesa                        | d2      | 8/1/1995         | 10/15/1998 | 1,354                            | 1,222                                 | 0.62                                   | 0.50            |
| Steep Colluvial             | d3      | 8/1/1995         | 10/16/1998 | 541                              | 1,247                                 | 1.33                                   | 1.1             |
| Valley alluvium             | d4      | 4/17/1996        | 11/4/1998  | 245                              | 1,277                                 | 14.2                                   | 11              |
| Average of all measurements |         |                  |            |                                  | 1,247                                 |                                        |                 |
| Range                       |         |                  |            |                                  | 1,037-1,366                           |                                        |                 |
| Standard Deviation          |         |                  |            |                                  | 100                                   |                                        |                 |

SUPPLEMENTARY TABLE DR9. SUMMARY OF NAIL/WASHER MEASUREMENTS IN: (A) VOLCANO HILL WASH AND (B) ARROYO CHAVEZ.

A) Volcano Hill Wash

| Nail ID* | Geomorphic component | Collection Dates |           | Length line (m) | Number of nail/washers on line | Ground-surface slope (degrees) | Net change in surface, (mm/year)<br>('+' is net erosion; '-' = net deposition) | Deposition (mm/yr) | Standard deviation of deposition measurements (mm) | Erosion (mm/yr) | Standard deviation of erosion measurements, (mm) |
|----------|----------------------|------------------|-----------|-----------------|--------------------------------|--------------------------------|--------------------------------------------------------------------------------|--------------------|----------------------------------------------------|-----------------|--------------------------------------------------|
|          |                      | Start            | End       |                 |                                |                                |                                                                                |                    |                                                    |                 |                                                  |
| n1       | Steep Colluvial      | 11/17/1998       | 7/20/1995 | 57.7            | 19                             | ---                            | 0.5                                                                            | 0.5                | 4.6                                                | 1.0             | 2.4                                              |
| n1       | Steep Colluvial      | 11/17/1998       | 7/20/1995 | 60.5            | 19                             | ---                            | -0.5                                                                           | 1.5                | 10.4                                               | 1.0             | 5.1                                              |
| n2       | Eolian               | 1/5/1999         | 7/25/1995 | 163.8           | 39                             | 1.9                            | -0.3                                                                           | 1.7                | 8.9                                                | 1.4             | 6.9                                              |
| n3       | Valley alluvium      | 11/11/1998       | 7/28/1995 | 28.9            | 9                              | 2.5                            | 0.2                                                                            | 1.2                | 10.3                                               | 1.4             | 4.7                                              |
| *n3      | Valley alluvium      | 11/11/1998       | 7/28/1995 | 24.1            | 11                             | 2.3                            | 1.9                                                                            | 0.2                | 4.6                                                | 2.0             | 15.1                                             |
| n4       | Steep Colluvial      | 11/13/1998       | 8/7/1995  | 90.0            | 15                             | ---                            | 2.6                                                                            | 1.5                | 9.7                                                | 4.1             | 14.8                                             |
| n5       | Steep Colluvial      | 12/4/1998        | 8/29/1995 | 108.4           | 20                             | 26.4                           | 2.5                                                                            | 0.6                | 4.1                                                | 3.2             | 8.4                                              |
| n6       | Mesa                 | 11/18/1998       | 8/29/1995 | 48.8            | 16                             | ---                            | 2.6                                                                            | 0.2                | 1.6                                                | 2.7             | 8.0                                              |
| n7       | Steep Colluvial      | 12/4/1998        | 8/29/1995 | 115.8           | 17                             | 24.7                           | 3.6                                                                            | 1.2                | 10.2                                               | 4.8             | 10.9                                             |
| n8       | Steep Colluvial      | 1/5/1999         | 8/7/1995  | 27.3            | 11                             | 26.3                           | 1.8                                                                            | 2.4                | 9.3                                                | 4.2             | 12.7                                             |
| n9       | Alluvial/colluvial   | 1/5/1999         | 3/22/1996 | 44.6            | 10                             | 4.5                            | -0.9                                                                           | 1.9                | 17.8                                               | 0.9             | 2.3                                              |
| n9       | Alluvial/colluvial   | 1/5/1999         | 3/22/1996 | 43.8            | 16                             | 5.4                            | 0.8                                                                            | 1.6                | 5.2                                                | 2.4             | 13.6                                             |
| n10      | Eolian               | 9/21/1998        | 8/30/1995 | 136.4           | 27                             | 2.7                            | -0.1                                                                           | 2.5                | 13.8                                               | 2.4             | 9.5                                              |
| n10      | Eolian               | 9/21/1998        | 8/30/1995 | 131.3           | 21                             | 2.9                            | 0.8                                                                            | 1.8                | 9.6                                                | 2.6             | 13.2                                             |

SUPPLEMENTARY TABLE DR9. CONTINUED. B) ARROYO CHAVEZ

| Nail ID* | Geomorphic component  | Collection Start | Dates End  | Length line (m) | Number of nail/washers on line | Ground-surface slope (degrees) | Net change in surface, (mm/year)<br>(*+ is net erosion; * - = net deposition) | Deposition (mm/yr) | Standard deviation of deposition measurements (mm) | Erosion (mm/yr) | Standard deviation of erosion measurements, (mm) |
|----------|-----------------------|------------------|------------|-----------------|--------------------------------|--------------------------------|-------------------------------------------------------------------------------|--------------------|----------------------------------------------------|-----------------|--------------------------------------------------|
| n1       | Mesa                  | 2/14/1996        | 11/16/1998 | 31.1            | 13                             | 9.5                            | 2.9                                                                           | 0.3                | 2.00                                               | 3.1             | 2.0                                              |
| n1       | Mesa                  | 2/21/1996        | 11/16/1998 | 40.4            | 9                              | ---                            | 4.1                                                                           | 2.3                | 8.02                                               | 6.3             | 23.4                                             |
| n1       | Mesa                  | 8/14/1995        | 11/16/1998 | 39.7            | 23                             | 9.1                            | 4.8                                                                           | 0.2                | 1.52                                               | 5.0             | 11.1                                             |
| n2       | Steep                 | 2/14/1996        | 11/16/1998 | 15.0            | 5                              | 7.3                            | 3.6                                                                           | 0.0                | ---                                                | 3.6             | 6.0                                              |
| n2       | Colluvial Steep       | 2/21/1996        | 11/16/1998 | 35.4            | 25                             | 10.3                           | 4.2                                                                           | 1.6                | 6.98                                               | 5.8             | 7.6                                              |
| n2       | Colluvial Steep       | 8/14/1995        | 11/16/1998 | 24.0            | 15                             | 6.1                            | 2.7                                                                           | 1.1                | 6.65                                               | 3.8             | 9.3                                              |
| n2       | Colluvial Steep       | 2/21/1996        | 12/15/1998 | 4.1             | 5                              | 16.8                           | 3.7                                                                           | 0.2                | 1.14                                               | 3.9             | 3.0                                              |
| n3       | Mesa                  | 2/21/1996        | 1/12/1999  | 17.6            | 13                             | ---                            | 5.2                                                                           | 1.5                | 6.50                                               | 6.7             | 9.5                                              |
| n3       | Mesa                  | 2/21/1996        | 12/15/1998 | 9.1             | 7                              | ---                            | -0.6                                                                          | 5.8                | 12.5                                               | 5.2             | 8.6                                              |
| n3       | Mesa                  | 2/21/1996        | 12/15/1998 | 32.7            | 21                             | 5.0                            | 1.3                                                                           | 3.7                | 11.7                                               | 5.0             | 14.0                                             |
| n4       | Mesa                  | 8/1/1995         | 1/12/1999  | 28.6            | 3                              | ---                            | 1.2                                                                           | 1.8                | 10.3                                               | 3.0             | 6.1                                              |
| n4       | Mesa                  | 2/21/1996        | 1/12/1999  | 27.8            | 11                             | 2.2                            | -2.7                                                                          | 5.6                | 12.6                                               | 2.9             | 15.0                                             |
| n4       | Mesa                  | 8/1/1995         | 1/1/1900   | 20.1            | 13                             | 4.4                            | 2.8                                                                           | 1.3                | 4.80                                               | 4.1             | 7.7                                              |
| n4       | Mesa                  | 8/1/1995         | 1/12/1999  | 19.5            | 23                             | ---                            | -2.1                                                                          | 7.0                | 22.5                                               | 4.9             | 15.8                                             |
| n5       | Steep                 | 4/9/1996         | 12/15/1998 | 44.3            | 18                             | 7.1                            | 0.7                                                                           | 2.4                | 12.4                                               | 3.1             | 9.9                                              |
| n5       | Colluvial Steep       | 4/9/1996         | 12/15/1998 | 55.1            | 20                             | 4.3                            | 4.2                                                                           | 1.8                | 15.9                                               | 6.0             | 9.5                                              |
| n5       | Colluvial Steep       | 4/9/1996         | 12/15/1998 | 24.6            | 15                             | 10.6                           | 2.1                                                                           | 1.8                | 6.74                                               | 4.0             | 0.4                                              |
| n6       | Fan                   | 3/19/1996        | 2/9/1999   | 41.8            | 19                             | 2.5                            | 5.7                                                                           | 4.0                | 15.0                                               | 9.6             | 21.4                                             |
| n6       | Fan                   | 3/19/1996        | 2/9/1999   | 70.1            | 15                             | 5.7                            | 1.7                                                                           | 1.2                | 7.70                                               | 2.9             | 6.9                                              |
| n6       | Fan                   | 3/19/1996        | 1/12/1999  | 64.8            | 20                             | 5.9                            | -1.0                                                                          | 6.0                | 17.9                                               | 5.0             | 8.8                                              |
| n6       | Fan                   | 3/19/1996        | 2/9/1999   | 27.4            | 11                             | 1.6                            | 3.6                                                                           | 0.2                | 2.53                                               | 3.8             | 5.9                                              |
| n6       | Fan                   | 3/19/1996        | 2/9/1999   | 82.2            | 18                             | 6.0                            | 0.6                                                                           | 2.8                | 10.6                                               | 3.5             | 8.6                                              |
| n7       | Fan                   | 3/19/1996        | 2/9/1999   | 59.3            | 18                             | 5.0                            | 1.1                                                                           | 1.7                | 9.16                                               | 2.8             | 6.2                                              |
| n7       | Fan                   | 3/19/1996        | 2/9/1999   | 59.1            | 20                             | 6.1                            | 2.1                                                                           | 3.1                | 11.6                                               | 5.3             | 12.4                                             |
| n7       | Fan                   | 3/19/1996        | 2/9/1999   | 52.2            | 19                             | 4.3                            | -0.4                                                                          | 3.4                | 17.5                                               | 2.9             | 13.6                                             |
| n8       | Steep Colluvial Steep | 4/18/1996        | 12/15/1998 | 100.6           | 22                             | 8.9                            | -6.4                                                                          | 16.0               | 35.0                                               | 9.5             | 17.6                                             |
| n9       | Colluvial             | 2/21/1996        | 2/12/1999  | 12.5            | 10                             | ---                            | 2.3                                                                           | 3.0                | 10.7                                               | 5.3             | 20.0                                             |
| n9       | Steep Colluvial Steep | 8/1/1995         | 2/12/1999  | 3.7             | 3                              | ---                            | 7.7                                                                           | 0.0                | ---                                                | 7.7             | 20.5                                             |
| n9       | Colluvial             | 9/20/1995        | 2/12/1999  | 12.2            | 6                              | ---                            | 1.1                                                                           | 2.5                | 12.8                                               | 3.6             | 6.8                                              |
| n10      | Fan                   | 9/20/1995        | 2/12/1999  | 16.9            | 5                              | ---                            | 3.5                                                                           | 1.0                | 12.0                                               | 4.5             | 7.9                                              |
| n10      | Fan                   | 9/20/1995        | 2/12/1999  | 15.2            | 6                              | 8.8                            | -0.7                                                                          | 5.4                | 20.8                                               | 4.7             | 10.8                                             |
| n10      | Fan                   | 9/20/1995        | 2/12/1999  | 65.4            | 12                             | 4.7                            | 10.2                                                                          | 4.07               | 21.0                                               | 15              | 38.7                                             |
| n11      | Valley alluvium       | 9/20/1995        | 2/12/1999  | 125.6           | 29                             | 3.4                            | 2.0                                                                           | 1.6                | 9.4                                                | 3.6             | 9.6                                              |
| n11      | Valley alluvium       | 9/20/1995        | 2/12/1999  | 129.2           | 19                             | 2.6                            | 2.2                                                                           | 1.0                | 8.3                                                | 3.2             | 9.5                                              |

SUPPLEMENTARY TABLE DR9. CONTINUED B) ARROYO CHAVEZ

| Nail ID* | Geomorphic component      | Collection Dates |           | Length line (m) | Number of nail/washers on line | Ground-surface slope (degrees) | Net change in surface, (mm/year) ('+' is net erosion; '-' = net deposition) | Deposition (mm/yr) | Standard deviation of deposition measurements (mm) | Erosion (mm/yr) | Standard deviation of erosion measurements, (mm) |
|----------|---------------------------|------------------|-----------|-----------------|--------------------------------|--------------------------------|-----------------------------------------------------------------------------|--------------------|----------------------------------------------------|-----------------|--------------------------------------------------|
| n12      | Mesa Valley               | 2/21/1996        | 2/12/1999 | 11.0            | 8                              | ---                            | 0.9                                                                         | 1.0                | 6.9                                                | 2.0             | 2.2                                              |
| n13      | alluvium Valley           | 4/9/1996         | 12/9/1998 | 4.9             | 10                             | 11.7                           | 7.0                                                                         | 0.5                | 3.6                                                | 7.5             | 11.8                                             |
| n13      | alluvium Valley           | 4/9/1996         | 12/9/1998 | 13.2            | 6                              | 2.7                            | 0.1                                                                         | 1.0                | 5.1                                                | 1.2             | 3.0                                              |
| n13      | alluvium Valley           | 4/9/1996         | 12/9/1998 | 4.0             | 8                              | ---                            | -0.1                                                                        | 9.2                | 31.5                                               | 9.2             | 16.3                                             |
| n14      | Moderately Sloping        | 9/26/1995        | 1/25/1999 | 239.3           | 36                             | 2.7                            | 1.6                                                                         | 1.4                | 10.7                                               | 3.1             | 7.9                                              |
| n15      | Moderately Sloping Valley | 9/26/1995        | 1/25/1999 | 243.8           | 26                             | 2.6                            | 0.6                                                                         | 2.1                | 13.3                                               | 2.7             | 8.0                                              |
| n16      | alluvium Valley           | 4/2/1996         | 12/9/1998 | 13.1            | 14                             | 6.7                            | 5.8                                                                         | 1.7                | 7.2                                                | 7.5             | 12.0                                             |
| n16      | alluvium Valley           | 4/2/1996         | 12/9/1998 | 8.8             | 9                              | 14.7                           | 7.6                                                                         | 0.3                | 1.6                                                | 7.9             | 12.1                                             |
| n16      | alluvium Valley           | 4/2/1996         | 12/9/1998 | 10.4            | 12                             | 7.5                            | 2.9                                                                         | 1.4                | 6.1                                                | 4.3             | 6.5                                              |
| n17      | Moderately Sloping        | 9/26/1995        | 1/25/1999 | 61.0            | 10                             | 3.6                            | -0.3                                                                        | 1.7                | 8.4                                                | 1.4             | 3.6                                              |
| n17      | Moderately Sloping        | 9/26/1995        | 1/25/1999 | 61.0            | 10                             | 3.4                            | 1.6                                                                         | 1.8                | 6.2                                                | 3.3             | 6.7                                              |

\*Several closely spaced nail lines were often installed and are shown as one nail id.

SUPPLEMENTARY TABLE DR10 SUMMARY OF CHANNEL CROSS-SECTION CHANGES, LISTED BY STREAM ORDER FOR A) VOLCANO HILL WASH AND B) ARROYO CHAVEZ

(A) Volcano Hill Wash

| Site ID (fig. 4a)         | Date: Initial survey | Date: Resurvey | Number of surveyed cross sections | Change in cross-sectional area (m <sup>2</sup> /yr) (+ = deposition; - = erosion) | Standard deviation of changes in cross-sectional area | Density of channel sediment (kg/m <sup>3</sup> ) | Channel width (m) | Channel depth (m) |
|---------------------------|----------------------|----------------|-----------------------------------|-----------------------------------------------------------------------------------|-------------------------------------------------------|--------------------------------------------------|-------------------|-------------------|
| <u>4th order channels</u> |                      |                |                                   |                                                                                   |                                                       |                                                  |                   |                   |
| c1                        | 6/28/95              | 5/28/98        | 3                                 | 0.03                                                                              |                                                       |                                                  | 40.6              | 1.6               |
| c2                        | 6/28/95              | 6/3/98         | 2                                 | 0.15                                                                              |                                                       |                                                  | 42.2              | 1.8               |
| c3                        | 6/28/95              | 6/1/98         | 1                                 | 0.11                                                                              |                                                       |                                                  | 23.1              | 1.8               |
| average 4th order         |                      |                |                                   | 0.09                                                                              | ± 0.31                                                | 1,545                                            |                   |                   |
| <u>3rd order channels</u> |                      |                |                                   |                                                                                   |                                                       |                                                  |                   |                   |
| c4                        | 6/28/95              | 6/3/98         | 2                                 | -0.10                                                                             |                                                       |                                                  | 24.7              | 2.1               |
| c5                        | 7/5/95               | 6/4/98         | 2                                 | 0.16                                                                              |                                                       |                                                  | 24.1              | 1.9               |
| c6                        | 7/5/95               | 6/4/98         | 1                                 | -0.10                                                                             |                                                       |                                                  | 41.8              | 2.1               |
| c7                        | 7/6/95               | 6/4/98         | 2                                 | 0.02                                                                              |                                                       |                                                  | 27.3              | 1.6               |
| c20                       | 7/28/95              | 07/16/98       | 3                                 | 0.28                                                                              |                                                       |                                                  | 9.2               | 1.3               |
| c17                       | 7/11/95              | 6/29/1998      | 2                                 | -0.01                                                                             |                                                       |                                                  | 17.5              | 1.8               |
| c10                       | 7/17/95              | 6/22/98        | 2                                 | -0.09                                                                             |                                                       |                                                  | 24.0              | 2.7               |
| c11                       | 7/17/95              | 07/16/98       | 2                                 | -0.20                                                                             |                                                       |                                                  | 17.2              | 1.5               |
| c12                       | 7/18/1995            | 06/22/98       | 2                                 | 0.01                                                                              |                                                       |                                                  | 13.6              | 2.0               |
| c18                       | 7/11/95              | 6/29/1998      | 2                                 | 0.18                                                                              |                                                       |                                                  | 13.5              | 2.1               |
| c19                       | 7/24/95              | 7/7/98         | 2                                 | -0.05                                                                             |                                                       |                                                  | 7.4               | 1.8               |
| c8                        | 7/24/1995            | 6/8/1998       | 2                                 | -0.06                                                                             |                                                       |                                                  | 30.2              | 2.0               |
| c9                        | 7/24/1995            | 6/8/1998       | 2                                 | -0.26                                                                             |                                                       |                                                  | 24.9              | 1.9               |
| average 3rd order         |                      |                |                                   | -0.02                                                                             | ± 0.20                                                | 1,558                                            |                   |                   |
| <u>2nd order channels</u> |                      |                |                                   |                                                                                   |                                                       |                                                  |                   |                   |
| c14                       | 7/6/95               | 7/2/98         | 2                                 | -0.03                                                                             |                                                       |                                                  | 29.8              | 1.7               |
| c15                       | 7/6/95               | 7/2/98         | 2                                 | 0.04                                                                              |                                                       |                                                  | 9.6               | 2.1               |
| c16                       | 7/12/95              | 7/2/98         | 4                                 | -0.10                                                                             |                                                       |                                                  | 9.5               | 2.3               |
| c21                       | 7/28/95              | 07/16/98       | 2                                 | -0.04                                                                             |                                                       |                                                  | 2.7               | 0.7               |
| c13                       | 7/17/95              | 06/22/98       | 2                                 | -0.13                                                                             |                                                       |                                                  | 13.3              | 3.5               |
| average 2nd order         |                      |                |                                   | -0.05                                                                             | ± 0.28                                                | 1,531                                            |                   |                   |
| <u>1st order channels</u> |                      |                |                                   |                                                                                   |                                                       |                                                  |                   |                   |
| c23                       | 7/12/95              | 7/7/98         | 3                                 | -0.54                                                                             |                                                       |                                                  | 2.2               | 1.3               |
| c22                       | 7/28/95              | 07/16/98       | 2                                 | 0.09                                                                              |                                                       |                                                  | 9.3               | 0.6               |
| average 1st order         |                      |                |                                   | -0.22                                                                             | ± 0.47                                                | 1,531                                            |                   |                   |

\* Standard deviation includes all cross sections used for a stream order.

SUPPLEMENTARY TABLE DR10 CONTINUED

## B) Arroyo Chavez

| Site ID (fig. 4b)         | Date: Initial survey | Date: Resurvey | Number of surveyed cross sections | Change in cross-sectional area (m <sup>2</sup> /yr) (+ = deposition; - = erosion) | Standard deviation of changes in cross-sectional area | Channel width (m) | Channel depth (m) |
|---------------------------|----------------------|----------------|-----------------------------------|-----------------------------------------------------------------------------------|-------------------------------------------------------|-------------------|-------------------|
| <u>4th order channels</u> |                      |                |                                   |                                                                                   |                                                       |                   |                   |
| c1a                       | 06/06/1995           | 7/20/1998      | 2                                 | 0.70                                                                              |                                                       | 5.7               | 1.34              |
| c1b                       | 06/06/1995           | 7/20/1998      | 2                                 | 0.42                                                                              |                                                       | 5.7               | 1.30              |
| Average 4th order         |                      |                |                                   | 0.56                                                                              | ± 0.25                                                |                   |                   |
| <u>3rd order channels</u> |                      |                |                                   |                                                                                   |                                                       |                   |                   |
| c2                        | 6/8/1995             | 07/23/1998     | 3                                 | -0.34                                                                             |                                                       | 12.2              | 2.8               |
| c3                        | 6/8/1995             | 07/23/1998     | 2                                 | 0.03                                                                              |                                                       | 11.7              | 4.0               |
| c4                        | 6/12/1995            | 8/11/1998      | 2                                 | -0.10                                                                             |                                                       | 9.9               | 4.8               |
| c5                        | 6/13/1995            | 8/11/1998      | 2                                 | -0.41                                                                             |                                                       | 13.8              | 4.2               |
| c6                        | 6/13/1995            | 08/19/1998     | 2                                 | 0.16                                                                              |                                                       | 12.7              | 4.9               |
| c10                       | 3/27/1996            | 7/30/1998      | 1                                 | -1.10                                                                             |                                                       | 13.6              | 2.8               |
| c11                       | 3/27/1996            | 7/30/1998      | 1                                 | -0.12                                                                             |                                                       | 17.2              | 3.2               |
| Average 3rd order         |                      |                |                                   | -0.27                                                                             | ± 0.38                                                |                   |                   |
| <u>2nd order channels</u> |                      |                |                                   |                                                                                   |                                                       |                   |                   |
| c7                        | 6/20/1995            | 08/18/1998     | 2                                 | -0.61                                                                             |                                                       | 8.7               | 5.1               |
| c8                        | 6/21/1995            | 9/3/1998       | 2                                 | 0.15                                                                              |                                                       | 8.9               | 3.5               |
| c9                        | 6/21/1995            | 08/19/1998     | 3                                 | -0.48                                                                             |                                                       | 13.5              | 4.8               |
| c12                       | 4/2/1996             | 11/2/1998      | 1                                 | -0.54                                                                             |                                                       | 15.3              | 1.7               |
| c13                       | 4/2/1996             | 11/2/1998      | 1                                 | -0.40                                                                             |                                                       | 2.5               | 1.4               |
| Average 2nd order         |                      |                |                                   | -0.38                                                                             | ± 0.36                                                |                   |                   |
| <u>1st order channels</u> |                      |                |                                   |                                                                                   |                                                       |                   |                   |
| c14                       | 06/06/1995           | 7/20/1998      | 2                                 | 0.21                                                                              |                                                       | 7.8               | 1.0               |
| c15                       | 06/20/1995           | 08/18/1998     | 3                                 | -0.81                                                                             |                                                       | 4.0               | 4.5               |
| c16                       | 3/12/1996            | 9/3-11/2/1998  | 5                                 | -0.01                                                                             |                                                       | 7.8               | 2.6               |
| Average 1st order         |                      |                |                                   | -0.20                                                                             | ± 0.81                                                |                   |                   |

\* Standard deviation includes all cross sections used for a stream order.
